# Supplementary material for: Synthesis of NbSe2single-crystalline nanosheet arrays for UV photodetectors
Source: Royal Society of Chemistry journal article supplement (doi:10.1039/d0ce01140a), 2020-01-01
Supplement: d0ce01140a1.pdf [file d0ce01140a1.pdf]

## Synthesis of NbSe<sub>2</sub> Single-crystalline Nanosheet Arrays for UV Photodetectors

*Xin Hu<sup>1</sup>, Enze Xu<sup>2</sup>, Shuguang Xiang<sup>1</sup>, Zhicheng Chen<sup>1</sup>, Xue Zhou<sup>1</sup>, Ning Wang<sup>1</sup>, Hongmei Guo<sup>1</sup>, Limin Ruan<sup>1</sup>, Yongbin Hu<sup>1</sup>, Changrun Li<sup>3</sup>, Dong Liang<sup>1\*</sup>, Yang Jiang<sup>2\*</sup>, Guohua Li<sup>1\*</sup>*

<sup>1</sup> School of Electronics and Information Engineering, National Engineering Research Center for Agro-Ecological Big Data Analysis & Application, Anhui Province Key Laboratory of Chemistry for Inorganic/Organic Hybrid Functionalized Materials, Anhui University, Hefei, Anhui 230601, P. R. China.

<sup>2</sup> School of Materials Science and Engineering, Hefei University of Technology, Hefei, Anhui 230009, P. R. China.

<sup>3</sup> Institutes of Physical Science and Information Technology, Anhui University, Hefei, Anhui 230601. P. R. China

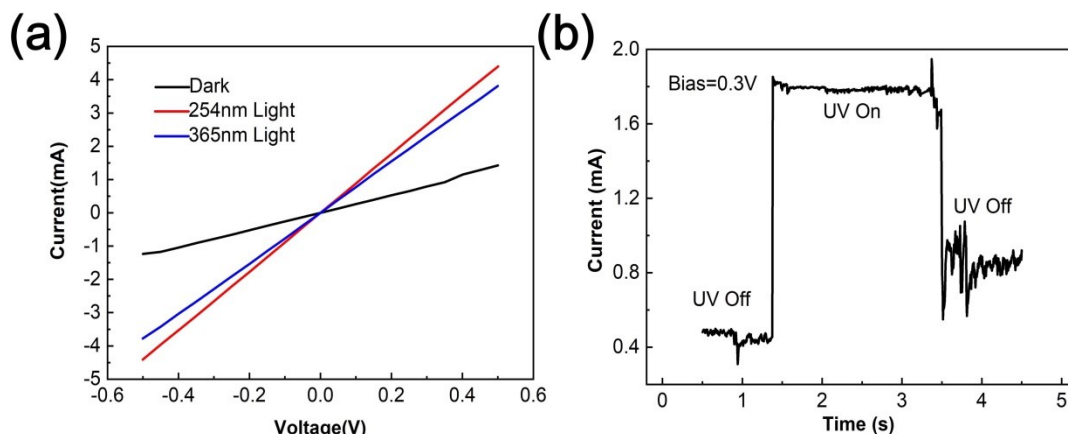

**Figure S1.** (c) The  $I$ - $V$  curve of the NbSe<sub>2</sub> device is under dark, 254nm and 365nm laser irradiation. (d) The  $I$ - $T$  curve of the NbSe<sub>2</sub> device at 0.3V bias under the irradiation of a 254nm laser.

Fig S1 shows the  $I$ - $V$  and  $I$ - $T$  characteristics of the NbSe<sub>2</sub> nanosheet photodetector. Linear  $I$ - $V$  indicates good contact between NbSe<sub>2</sub> nanosheets and electrodes. The Fig S1a clearly shows that when a device is measured in darkness, 356 nm and 254 nm UV light irradiation, the current increases gradually. The resistivity of the NbSe<sub>2</sub> nanosheet arrays is estimated to be  $2.5 \times 10^{-3} \Omega \cdot \text{m}$  under dark condition and while  $7.5 \times 10^{-4} \Omega \cdot \text{m}$  and  $6.7 \times 10^{-4} \Omega \cdot \text{m}$  under 365nm and 254nm UV light irradiation, respectively. Fig S1b shows the  $I$ - $T$  (current-time) curve of the NbSe<sub>2</sub> device under 254 nm UV light irradiation. When the bias reaches 0.3V, the measured current is 1.8 and 0.4 mA, respectively. The on/off ratio of this device is 4.5, and the response time for both rise and fall is  $\sim 7$  ms. The fast response to UV light of the devices is due to the high crystal quality of NbSe<sub>2</sub> nanosheets.

The density functional theory (DFT) computations were performed using the projector augmented wave (PAW) method and Perdew-Burke-Ernzerhof (PBE) generalized gradient approximation functional<sup>1</sup>. Monkhorst-Pack k-point grid of  $8 \times 8$

$\times 1$  was used for structural relaxation, and  $16 \times 16 \times 1$  for self-consistent calculations. The convergence threshold was  $10^{-4}$  eV in energy and  $10^{-3}$  eV/Å in force. The cutoff energy used for the plane-wave basis set is 400 eV.

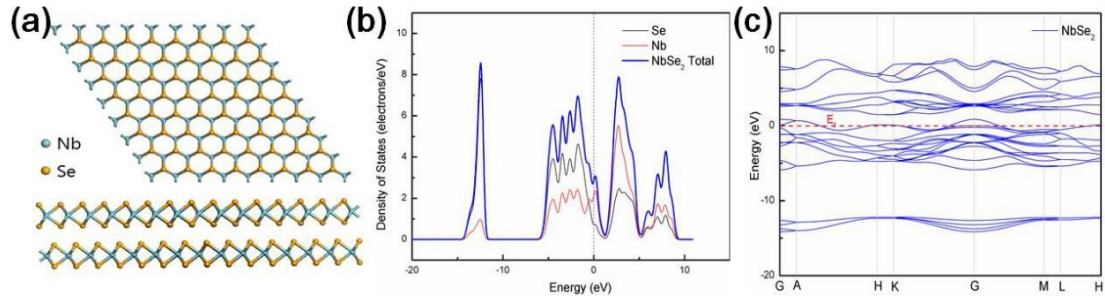

**Figure S2.** (a) Hexagonal crystal structure of 2H-NbSe<sub>2</sub>, The blue and yellow balls represent Nb and Se atomic columns. (b) Using GGA-PBE to approximately estimate the state density of 2H-NbSe<sub>2</sub>. (c) The energy band structure of NbSe<sub>2</sub> along the brillouin belt in the direction of high symmetry.

To further understand the microstructure and electrical properties of the NbSe<sub>2</sub> nanosheet arrays, we employed density functional theory (DFT) computation on 2H-NbSe<sub>2</sub>. Fig S2(a) shows the overall structure of NbSe<sub>2</sub>, which belongs to the hexagonal system with space group P-6m2. Each Nb atom is surrounded by six Se atoms, and has triangular prism symmetry<sup>2, 3</sup>. The stacking along the c axis starts from Se-Nb-Se, and a slab is formed in this order, with a strong covalent bond between the three atomic layers and a one-weak bond between the vdws-type slabs. Fig S2(b) shows the atom projected density of states (DOS) diagram for NbSe<sub>2</sub>. It obviously shows that there is a partial wave DOS across the Fermi level, which confirms the semimetal nature of the 2H- NbSe<sub>2</sub>. The DOS below the Fermi level is dominated by the Se element and energy above the Fermi level is dominated by the

Nb element<sup>1</sup>. The energy band structure of 2H-NbSe<sub>2</sub> along the highly symmetric direction is shown in Fig S2(c), where the GGA-PBE approximation is used in the calculation. As shown in Fig S2(c), the compound exhibits a special energy band structure, which represents a layered structural system, in which the intermediate band located in energy gap around  $E_f$ . The presence of bands crossing the  $E_f$  means that 2H-NbSe<sub>2</sub> is in semimetallic state, and these bands originate mainly from Se 4p and partial from Nb 4d states, indicating that there is a hybrid between them<sup>2</sup>. The calculated band structure of 2H-NbSe<sub>2</sub> is validated by the experimental data from angle-resolved light emission spectra (ARPES)<sup>4</sup>.

1 A. Khan, H. U. Din, M. Idrees, F. Khan, T. A. Alrebdi, C. V. Nguyen, M. Shafiq and B. Amin, *Physics Letters A*, 2019, **383**, 125867.

2 H. Kouarta, K. Zanata and H. Belkhir, *Journal of Superconductivity and Novel Magnetism*, 2018, **32**, 805-819.

3 B. Guster, C. Rubio-Verdu, R. Robles, J. Zaldivar, P. Dreher, M. Pruneda, J. A. Silva-Guillen, D. J. Choi, J. I. Pascual, M. M. Ugeda, P. Ordejon and E. Canadell, *Nano Lett*, 2019, **19**, 3027-3032.

4 D. J. Rahn, S. Hellmann, M. Kalläne, C. Sohrt, T. K. Kim, L. Kipp and K. Rossnagel, *Physical Review B*, 2012, **85**.
